# Supplementary material
Source: PubMed Central journal article supplement (PMC3175936)
Supplement: 10-7032_z7g999111725sf01.pdf [file 10-7032_z7g999111725sf01.pdf]

1 **Supplementary Figure 1.** ClustalW alignment of the amino acid sequences of  
2 alphaherpes virus  $\alpha$ 22 homologs. The source of the sequences is described in Table 1.

3

1 **Supplementary Figure 1**

2  
3

|    |        |                                                                |     |
|----|--------|----------------------------------------------------------------|-----|
| 4  | HSV-1  | MADISPGAFAPCVKARRPALR-SPPLGTRKRRKRRPSRPLSSESEVESDTELESEVESETAS | 59  |
| 5  | HSV-2  | MADIPPDPPALNTTPANHAPP-SPPPGSRKRRRPVLPSSSESESEKPDTESESE---SSTES | 56  |
| 6  | SA8    | ---MPTDTSAFASASANPSPPPSPVLNGSRRCFRRLPSLSDSDSEGSSGAVVLGGGEAGL   | 57  |
| 7  | VZV    | -----MFCTSPATRGDS-----SES-----                                 | 15  |
| 8  | GaHV-2 | -----                                                          |     |
| 9  | DEV    | ---MATASRRPSGQACEQVTVTVSYVQGLSNPSTSTALWSSPPATLTKPSIE-----      | 49  |
| 10 |        |                                                                |     |
| 11 |        |                                                                |     |
| 12 | HSV-1  | DSTESGDQDEAPRIGRRRAPRRLGGRFFLDMSAESTTGTET-----                 | 100 |
| 13 | HSV-2  | SEDEAGD----LRGRRRSPRELGGRYFLDLSAESTTGTES-----                  | 93  |
| 14 | SA8    | ESGGATD----QRSRVRGGLRVAGGMYFIDDEAEEASELESEPETDTDFESVSEADLESV   | 113 |
| 15 | VZV    | -----                                                          |     |
| 16 | GaHV-2 | -----                                                          |     |
| 17 | DEV    | -----                                                          |     |
| 18 |        |                                                                |     |
| 19 |        |                                                                |     |
| 20 | HSV-1  | -DAS--VSDDPDDTSD-WSYDDIPPRPKRARVNLRLTSSPDRRDGVIFFPKMGR-VRSTRE  | 155 |
| 21 | HSV-2  | -EGTGPSDDDDDDASDGWLVDTPPRKSKRPRINLRLTSSPDRRAGVVFPEVWRSRPIRA    | 152 |
| 22 | SA8    | SEVTSGLGSDSDSDSDGSADEPRAGRQPPIRINIRLVSSPDRRAGVVFPEVWRSRPIRA    | 169 |
| 23 | VZV    | -----KPGASVDVNGKMEYGSAPGLNG-----                               | 38  |
| 24 | GaHV-2 | -----MSRDRDRARPDTLSSSDNESDDEDYQLPHS-----                       | 31  |
| 25 | DEV    | -----SPRRQLDPRTPVKPRQQMSPAGGDMWDLHKS----ITV                    | 83  |
| 26 |        |                                                                |     |
| 27 |        |                                                                |     |
| 28 | HSV-1  | TQPRAPTSPASPNAMLRRSVRQAQRSSARWTPDLGYMRQCINQLFRVLRVARD-PHGS     | 214 |
| 29 | HSV-2  | AQPQAP-ASLPGIAHAHRRSARQAQMRSGAAWTLDLHYIRQCVNQLFRILRAAPN-PPGS   | 210 |
| 30 | SA8    | SPGTET-PPSERPDGSEERRATRASEGHHPEWSPDLPYLRRSINGMFRLLRRGIN-PRGA   | 227 |
| 31 | VZV    | -----RDTSRGPGAFCTPGWEIHPARLVEDINRVFLCIAQSSGRVTRD               | 81  |
| 32 | GaHV-2 | -----HPEYGSDDSDQDFELNNVGFKFCPLPWKPDVARLCADTNKLFRCFIRCLNSGPF    | 85  |
| 33 | DEV    | DHKEYGPPVPPDEARSGMDPKMGPGAFASFWLPDATTRLGDVNVLFKAIIRASGSTGRY    | 143 |
| 34 |        | * . : * :*                                                     |     |
| 35 |        |                                                                |     |
| 36 | HSV-1  | ANRLRHLIRDCYLMGYCRARLAPRTWCRLQVSGGTWGMHLRNTIREVEARFDATAEPCV    | 274 |
| 37 | HSV-2  | ANRLRHLVRDCYLMGYCRTLGPRTWGRLQISGGTWDVRLRNAIREVEAHFEPAAEPCV     | 270 |
| 38 | SA8    | ADRLRRLVRDCYLLGYTRHRLPEGMWPRMLQVGGG-QAARLRNVIENVVLRAGDAGE-IL   | 285 |
| 39 | VZV    | SRRLRRLICLDFYLMGRTRQRPTLACWEELLQLQPT-QTQCLRATLMEVSHRPPRGEDGFI  | 140 |
| 40 | GaHV-2 | HDALRRALFDIHMIGRMGYRLKQAEWETIMNLTTPR-QLHLRRTLRDADSR---SAHPIS   | 141 |
| 41 | DEV    | CRAFRRSLLEFYLIIGRYGPRLPREGWEATLQLSPN-QSGPLRAVLREADGRIVNNTGYME  | 202 |
| 42 |        | *: : ::* * * : : ** . : . :                                    |     |
| 43 |        |                                                                |     |
| 44 | HSV-1  | KLPCLETRRYGPECDSLNLIEHLSATS--DDEISDATDLEAAGSDHTLASQSDTEDAPSP   | 332 |
| 45 | HSV-2  | ELPCLNARRYGPECVGNLETNGGSTS--DDEISDATD-----SDDTLASHSDTEGGPSP    | 323 |
| 46 | SA8    | PMPPSPREHHGVACDRSD-ASDAASDD--DSRLGPGDDDTPDSDATLESASDDERAAAP    | 342 |
| 47 | VZV    | EAPNVPLHRSALECDVSD---DGGEDD--SDDDGSTPSDVIEFRSDAESSDGEDFIVEE    | 195 |
| 48 | GaHV-2 | DIYASDSIFHPIAASSGTISSDCDVKG--MNDLS-----VDSKLH-----             | 179 |
| 49 | DEV    | GPFPGTEAPYGAECEVDGGCYSDDERSECESDLSEGDMNFVLSDDTESERGYDSDASVRS   | 262 |
| 50 |        | . . . . *                                                      |     |
| 51 |        |                                                                |     |
| 52 | HSV-1  | VTLE---TPE--PRGSLAVRLEDEFGEFDWTPQEGSQPWLSAVVADTSSVERPGPSDGA    | 387 |
| 53 | HSV-2  | AGRE---NPESASGGAIARLECEFGTFDWTSEEGSQPWLSAVVADTSSAERSGLPAGA     | 380 |
| 54 | SA8    | PGAASGGPPEENAPGSVASRLRREFFVAFDWTPEEGSQPWLSVAVDTSSEARRRGDSGPG   | 402 |
| 55 | VZV    | ESEE---STDSCEPDGVPDCYRDGDGNCNTPSPKRPQ----RAIERYAGAETAETAAKA    | 248 |
| 56 | GaHV-2 | -----                                                          |     |
| 57 | DEV    | VTSSSHSNCDDVDYDPLGDLSEEEEMTSSVSTSDSESEVIEVIGTKRKRPTTRSMSALAG   | 322 |
| 58 |        |                                                                |     |
| 59 |        |                                                                |     |
| 60 | HSV-1  | GRAAEDRKCLDGCCKMRFSTACPYPCSDTFLRP                              | 420 |
| 61 | HSV-2  | CRATEAPEREDGCRKMRFPAAACPYPCGHTFLRP                             | 413 |
| 62 | SA8    | CRERETG----GCRMRRFSTTCPYPCGRTFRLM                              | 431 |
| 63 | VZV    | LTALGEGGVWDKRRRHEAPRRHDIPPPFGV---                              | 278 |
| 64 | GaHV-2 | -----                                                          |     |
| 65 | DEV    | TTKRPKS-----                                                   | 329 |
| 66 |        |                                                                |     |
